# Supplementary material for: Prevalence of Genetic Variants and Deep Phenotyping in Patients with Thoracic Aortic Aneurysm and Dissection: A Cross-Sectional Single-Centre Cohort Study
Source: MDPI journal article supplement (doi:10.3390/jcm13020461), 2024-01-14

Table S1

| Demographic distribution and risk factors      |                                 |                                                                                     |         |
|------------------------------------------------|---------------------------------|-------------------------------------------------------------------------------------|---------|
| Parameter                                      | Results<br>n = 95, study cohort | n = 716, totally<br>screened with<br>fulfilled inclusion<br>/ exclusion<br>criteria | p-value |
| Age                                            | 54.9 ± 12.0                     | 59.2 ± 8.2                                                                          | 0.832   |
| Male sex                                       | 70.5%                           | 68.7%                                                                               | 0.385   |
| Aortic surgery                                 | 68.4%                           | 72.1%                                                                               | 0.153   |
| TEVAR                                          | 31.6%                           | 27.9%                                                                               | 0.278   |
| Main diagnosis TAD                             | 57.9%                           | 44.6 %                                                                              | 0.009   |
| Main diagnosis TAA                             | 42.1%                           | 52.4%                                                                               | 0.007   |
| Cardiovascular risk factors                    |                                 |                                                                                     |         |
| Arterial hypertension                          | 83.2%                           | 80.9%                                                                               | 0.532   |
| (Ex-)nicotine                                  | 33.7%                           | 35.1%                                                                               | 0.874   |
| Hypercholesterolemia                           | 32.6%                           | 29.8%                                                                               | 0.756   |
| Diabetes mellitus                              | 8.4%                            | 9.7%                                                                                | 0.544   |
| CHD (coronary heart<br>disease)                | 13.7%                           | 12.3 %                                                                              | 0.223   |
| Carotid stenosis or stroke                     | 5.3%                            | 6.1%                                                                                | 0.178   |
| PAD (peripheral arterial<br>occlusive disease) | 4.2%                            | 3.6%                                                                                | 0.159   |
| Medications                                    |                                 |                                                                                     |         |
| Beta blockers                                  | 94.7%                           | 92.8%                                                                               | 0.656   |
| ACE inhibitors/AT1<br>receptor antagonists     | 83.1%                           | 81.7%                                                                               | 0.258   |
| Platelet aggregation<br>inhibitors             | 42.1%                           | 40.9%                                                                               | 0.175   |
| Calcium antagonists                            | 41.1%                           | 39.2%                                                                               | 0.288   |
| Diuretics                                      | 40.0%                           | 42.4%                                                                               | 0.731   |
| Oral anticoagulation                           | 36.8%                           | 29.7%                                                                               | 0.021   |
| Other antihypertensive<br>drugs                | 21.1%                           | 22.3%                                                                               | 0.410   |

Table S2

| Distribution of phenotypical characteristics                                                          |               |
|-------------------------------------------------------------------------------------------------------|---------------|
| Phenotypic characteristic                                                                             | Result (in %) |
| <b>Family History</b>                                                                                 |               |
| Positive family history of connective tissue or aortic disease<br>In first- to third-degree relatives | 20%           |
| 1st degree relatives with aortic dissection                                                           | 2.1%          |
| 1st degree relatives with aortic aneurysm                                                             | 4.2%          |
| <b>Stature</b>                                                                                        |               |
| Normal height                                                                                         | 91.6%         |
| Normal Relationship from arm span to body length                                                      | 85.3%         |
| Ratio of arm span to body length above to the normal range                                            | 14.7%         |
| Tall stature                                                                                          | 6.3%          |
| Striae                                                                                                | 5.3%          |
| Arachnodactyly                                                                                        | 3.2%          |
| Short stature                                                                                         | 2.1%          |
| Increased skin elasticity                                                                             | 1.1%          |
| <b>Skeletal deformities</b>                                                                           |               |
| Pes planus                                                                                            | 20.0%         |
| Scoliosis                                                                                             | 13.7%         |
| Pectus carinatum                                                                                      | 6.3%          |
| Pectus excavatum                                                                                      | 4.2%          |
| Protrusion acetabuli                                                                                  | 1.1%          |
| Pes equinovarus                                                                                       | 0%            |
| <b>Craniofacial anomalies</b>                                                                         |               |
| Thin lips                                                                                             | 25.3%         |
| Higher palate                                                                                         | 14.7%         |
| Dolichocephaly                                                                                        | 5.3%          |
| Hypertelorism                                                                                         | 1.1%          |
| Cleft palate                                                                                          | 0%            |
| Craniosynostosis                                                                                      | 0%            |
| Midface hypoplasia                                                                                    | 0%            |
| Micrognathia                                                                                          | 0%            |
| Uvula bifida                                                                                          | 0%            |
| <b>Joint function</b>                                                                                 |               |
| Murdoch sign                                                                                          | 9.5%          |
| Joint dislocations                                                                                    | 5.3%          |
| Steinberg sign                                                                                        | 4.2%          |
| Beighton Score 1                                                                                      | 4.2%          |
| Beighton Score 4                                                                                      | 2.1%          |

|                               |       |
|-------------------------------|-------|
| Beighton Score 2              | 1.1%  |
| <b>Ophthalmic pathologies</b> |       |
| Myopia $\geq 3$ diopters      | 14.7% |
| Enophthalmos                  | 11.6% |
| Cataract                      | 7.4%  |
| Blue sclera                   | 7.4%  |
| Glaucoma                      | 5.3%  |
| Ablation retinae              | 0%    |
| Iris hypoplasia               | 0%    |
| Ectopia lentis                | 0%    |
| <b>General diagnoses</b>      |       |
| Hernias                       | 23.2% |
| Spontaneous pneumothorax      | 0%    |
| Dura ectasia                  | 0%    |
| <b>Cardiovascular</b>         |       |
| Bicuspid aortic valve         | 17.9% |
| Atrial septal defect          | 4.2%  |

Figure S1

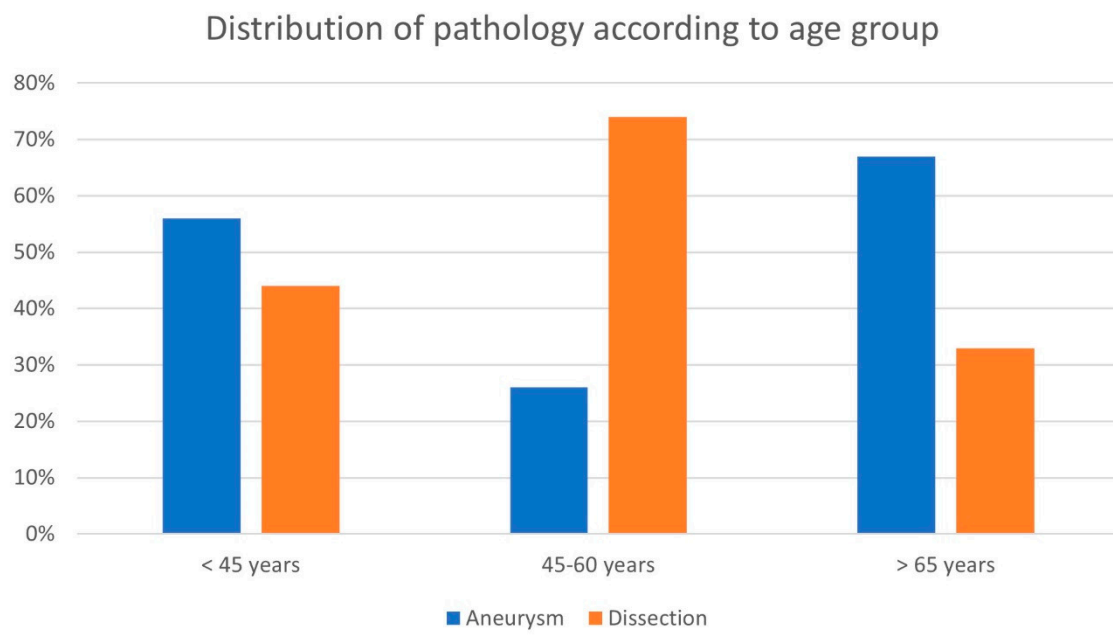

Figure S2

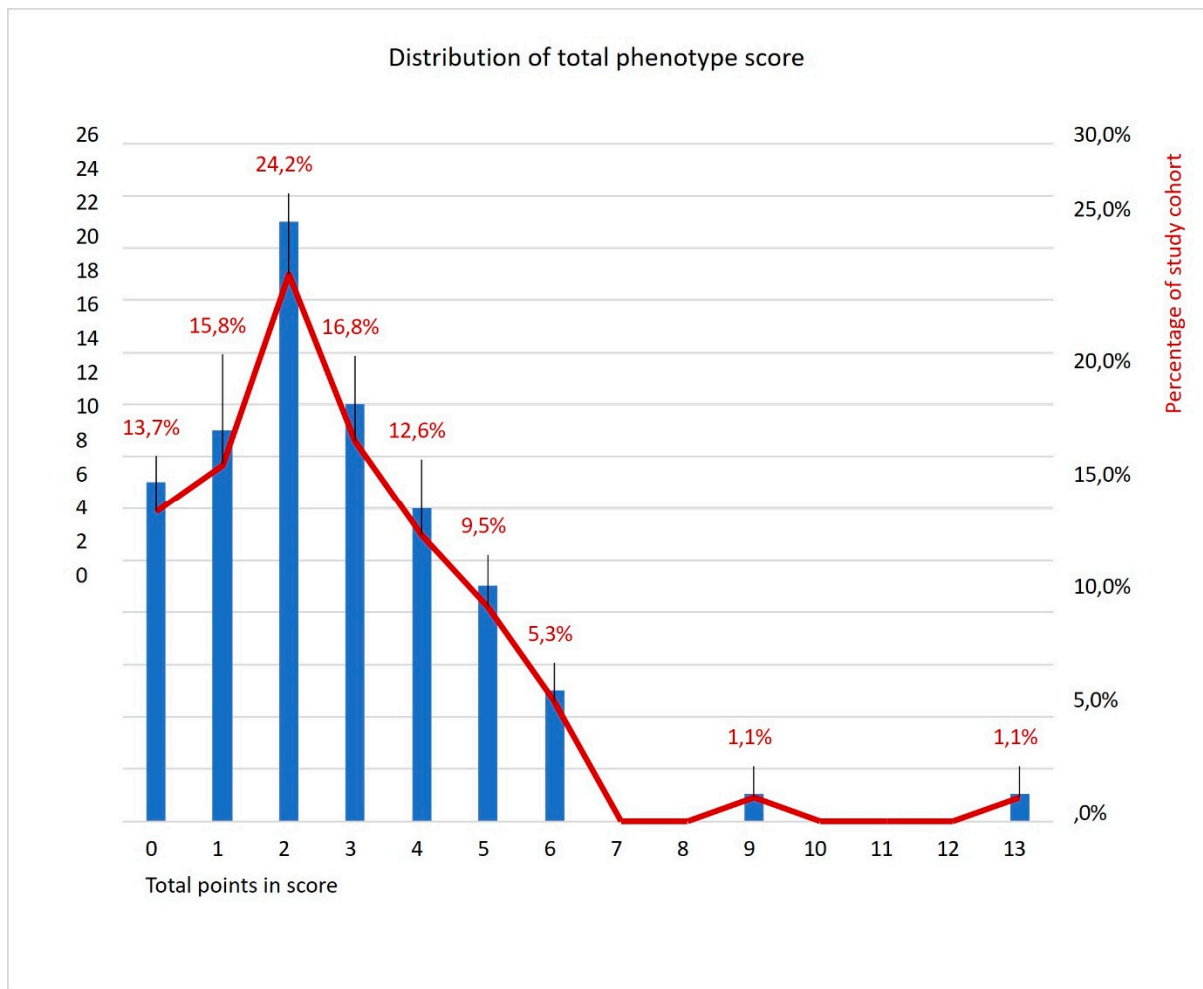

Supplement: s1 [file s1]
